# Supplementary material for: Less toxic zinc(ii), diorganotin(iv), gallium(iii) and cadmium(ii) complexes derived from 2-benzoylpyridine N,N-dimethylthiosemicarbazone: synthesis, crystal structures, cytotoxicity and investigations of mechanisms of action
Source: Royal Society of Chemistry journal article supplement (doi:10.1039/c8tx00127h), 2018-01-01
Supplement: c8tx00127h1.pdf [file c8tx00127h1.pdf]

Supporting Information for

**Less Toxic Zinc(II), Diorganotin(IV), Gallium(III) and Cadmium(II) Complexes  
Derived from 2-benzoylpyridine N,N-dimethylthiosemicarbazone: Synthesis,  
Crystal Structures, Cytotoxicity and Investigations of Mechanisms of Action**

Yan Fang, Jie Li, Pei-Pei Han, Qiu-Xia Han\* and Ming-Xue Li\*

Henan Key Laboratory of Polyoxometalates, Institute of Molecular and Crystal Engineering,

College of Chemistry and Chemical Engineering, Henan University

E-mail address: [limingxue@henu.edu.cn](mailto:limingxue@henu.edu.cn)(M.-X. Li); [qiuxia\\_han@163.com](mailto:qiuxia_han@163.com)(Q.-X Han);

## Contents

**Table S1** Summary of Crystal Data and Refinement Results for Complexes 1–4.

**Table S2** Selected bond lengths (Å) and angles (deg) of complexes 1–4.

**Table S3** The cytotoxicity of the tested compounds against HepG2 cells and QSG7701 cells.

**Table S4** Effects of **1** on intracellular ROS in HepG2 cells.

**Table S5** Effect of **1** on MMP in HepG2 cells.

**Table S6** Effects of **1**-induced activations of caspase-3.

**Table S7** Effects of **1** on the activation of the p21 gene in HepG2 cells

**Table S8** Effects of **1** on the activation of the p53 gene in HepG2 cells.

**Figure S1.** Structure of complex **1** with atomic numbering scheme.

**Figure S2.** Structure of complex **2** with atomic numbering scheme.

**Figure S3.** Structure of complex **3** with atomic numbering scheme.

**Figure S4.** Structure of complex **4** with atomic numbering scheme.

**Table S1** Summary of Crystal Data and Refinement Results for Complexes 1–4.

| Compound                  | <b>1</b>                                                         | <b>2</b>                                                          | <b>3</b>                                                                       | <b>4</b>                                                        |
|---------------------------|------------------------------------------------------------------|-------------------------------------------------------------------|--------------------------------------------------------------------------------|-----------------------------------------------------------------|
| Empirical formula         | C <sub>30</sub> H <sub>30</sub> N <sub>8</sub> S <sub>2</sub> Zn | C <sub>29</sub> H <sub>28</sub> N <sub>4</sub> O <sub>2</sub> SSn | C <sub>30</sub> H <sub>30</sub> GaN <sub>9</sub> O <sub>3</sub> S <sub>2</sub> | C <sub>30</sub> H <sub>30</sub> CdN <sub>8</sub> S <sub>2</sub> |
| Formula weight            | 632.11                                                           | 615.30                                                            | 698.47                                                                         | 679.14                                                          |
| Crystal size (mm)         | 0.50×0.41×0.23                                                   | 0.38×0.25×0.17                                                    | 0.68×0.23×0.09                                                                 | 0.49×0.34×0.26                                                  |
| Crystal system            | Monoclinic                                                       | Monoclinic                                                        | Monoclinic                                                                     | Monoclinic                                                      |
| Space group               | <i>P2(1)/c</i>                                                   | <i>P2(1)/c</i>                                                    | <i>P2(1)/n</i>                                                                 | <i>C2/c</i>                                                     |
| <i>T</i> (K)              | 296(2)                                                           | 296(2)                                                            | 293(2)                                                                         | 296(2)                                                          |
| <i>a</i> (Å)              | 16.408(3)                                                        | 17.15(2)                                                          | 18.441                                                                         | 16.9715(10)                                                     |
| <i>b</i> (Å)              | 8.6188(15)                                                       | 10.549(13)                                                        | 8.936                                                                          | 23.6235(15)                                                     |
| <i>c</i> (Å)              | 21.365(4)                                                        | 16.45(2)                                                          | 21.809                                                                         | 15.9881(10)                                                     |
| <i>V</i> (Å) <sup>3</sup> | 2995.0(9)                                                        | 2914(6)                                                           | 3583.8                                                                         | 6249.1(7)                                                       |
| <i>α</i> (°)              | 90.00                                                            | 90.00                                                             | 90.00                                                                          | 90.00                                                           |
| <i>β</i> (°)              | 97.571(3)                                                        | 101.78(3)                                                         | 94.29                                                                          | 102.8670(10)                                                    |

|                                                     |                                                                        |                                                                        |                                                                      |                                                                        |
|-----------------------------------------------------|------------------------------------------------------------------------|------------------------------------------------------------------------|----------------------------------------------------------------------|------------------------------------------------------------------------|
| $\gamma$ (°)                                        | 90.00                                                                  | 90.00                                                                  | 90.00                                                                | 90.00                                                                  |
| $D_c$ (g cm <sup>-3</sup> )                         | 1.402                                                                  | 1.402                                                                  | 1.295                                                                | 1.444                                                                  |
| $Z$                                                 | 4                                                                      | 4                                                                      | 4                                                                    | 8                                                                      |
| $\mu$ (mm <sup>-1</sup> )                           | 0.994                                                                  | 0.980                                                                  | 0.927                                                                | 0.866                                                                  |
| $\theta$ (°)                                        | 1.92–25.0                                                              | 2.28–25.00                                                             | 1.87–25.00                                                           | 1.72–25.00                                                             |
| $F(000)$                                            | 1312                                                                   | 1248                                                                   | 1440                                                                 | 2768                                                                   |
| hkl Range                                           | $-19 \leq h \leq 16,$<br>$-10 \leq k \leq 10, -24$<br>$\leq l \leq 25$ | $-20 \leq h \leq 19,$<br>$-12 \leq k \leq 11,$<br>$-16 \leq l \leq 19$ | $-21 \leq h \leq 15, -10$<br>$\leq k \leq 10, -25 \leq l \leq$<br>25 | $-20 \leq h \leq 14, -27$<br>$\leq k \leq 27, -18 \leq l$<br>$\leq 18$ |
| Refl. collected                                     | 5264                                                                   | 5128                                                                   | 6302                                                                 | 5506                                                                   |
| Refl. unique                                        | 4243                                                                   | 4093                                                                   | 2623                                                                 | 4679                                                                   |
| $R_{\text{int}}$                                    | 0.0190                                                                 | 0.0377                                                                 | 0.1557                                                               | 0.0234                                                                 |
| Parameters                                          | 370                                                                    | 334                                                                    | 407                                                                  | 370                                                                    |
| $R_1, wR_2 [I \geq 2\sigma(I)]$                     | 0.0353, 0.1161                                                         | 0.0297, 0.0745                                                         | 0.1430, 0.2260                                                       | 0.0281, 0.0708                                                         |
| $R_1, wR_2$ (all dates)                             | 0.0474, 0.1243                                                         | 0.0422, 0.0795                                                         | 0.3635, 0.3933                                                       | 0.0366, 0.0743                                                         |
| Goodness-of-fit on $F^2$                            | 0.956                                                                  | 0.998                                                                  | 1.268                                                                | 1.060                                                                  |
| $\Delta\rho_{\text{max, min}}$ (e Å <sup>-3</sup> ) | 0.521, -0.251                                                          | 0.360, -0.446                                                          | 2.646, -0.862                                                        | 0.475, -0.311                                                          |

**Table S2** Selected bond lengths (Å) and angles (deg) of complexes 1–4.

| 1         |            | 2           |            | 3         |           | 4         |            |
|-----------|------------|-------------|------------|-----------|-----------|-----------|------------|
| Zn1–N7    | 2.1332(19) | Sn1–C22     | 2.178(4)   | Ga1–N7    | 1.994(8)  | Cd1–N3    | 2.3751(19) |
| Zn1–N3    | 2.1441(19) | Sn1–C16     | 2.183(4)   | Ga1–N3    | 2.053(8)  | Cd1–N7    | 2.384(2)   |
| Zn1–N4    | 2.213(2)   | Sn1–O2      | 2.355(3)   | Ga1–N4    | 2.111(8)  | Cd1–N8    | 2.396(2)   |
| Zn1–N8    | 2.2455(19) | Sn1–N3      | 2.395(3)   | Ga1–N8    | 2.130(8)  | Cd1–N4    | 2.420(2)   |
| Zn1–S1    | 2.4331(8)  | Sn1–O1      | 2.432(3)   | Ga1–S1    | 2.368(3)  | Cd1–S1    | 2.5609(7)  |
| Zn1–S2    | 2.4371(8)  | Sn1–N4      | 2.459(3)   | Ga1–S2    | 2.372(3)  | Cd1–S2    | 2.5616(7)  |
| S1–C3     | 1.719(3)   | Sn1–S1      | 2.612(3)   | S1–C3     | 1.712(11) | S1–C3     | 1.729(3)   |
| S2–C18    | 1.725(3)   | S1–C3       | 1.762(3)   | S2–C18    | 1.667(11) | S2–C18    | 1.740(3)   |
| N2–C3     | 1.344(3)   | N2–C3       | 1.347(4)   | N2–C3     | 1.269(12) | N2–C3     | 1.336(3)   |
| N2–N3     | 1.367(3)   | N2–N3       | 1.376(3)   | N2–N3     | 1.344(11) | N2–N3     | 1.362(2)   |
| N3–C4     | 1.289(3)   | N3–C4       | 1.324(4)   | N3–C4     | 1.294(11) | N3–C4     | 1.301(3)   |
| N6–C18    | 1.333(3)   | C22–Sn1–C16 | 167.67(12) | N6–C18    | 1.359(13) | N6–C18    | 1.331(3)   |
| N6–N7     | 1.348(3)   | C22–Sn1–O2  | 89.80(10)  | N6–N7     | 1.388(11) | N6–N7     | 1.367(2)   |
| N7–C19    | 1.299(3)   | C16–Sn1–O2  | 91.06(9)   | N7–C19    | 1.310(13) | N7–C19    | 1.298(3)   |
| N7–Zn1–N3 | 161.11(8)  | C22–Sn1–N3  | 87.51(12)  | N7–Ga1–N3 | 174.9(3)  | N3–Cd1–N7 | 151.03(6)  |
| N7–Zn1–N4 | 93.77(7)   | C16–Sn1–N3  | 97.19(11)  | N7–Ga1–N4 | 98.9(3)   | N3–Cd1–N8 | 95.00(7)   |
| N3–Zn1–N4 | 73.99(7)   | O2–Sn1–N3   | 152.98(8)  | N3–Ga1–N4 | 78.0(3)   | N7–Cd1–N8 | 67.99(6)   |
| N7–Zn1–N8 | 73.91(7)   | C22–Sn1–O1  | 86.71(13)  | N7–Ga1–N8 | 78.5(3)   | N3–Cd1–N4 | 68.38(6)   |
| N3–Zn1–N8 | 91.62(7)   | C16–Sn1–O1  | 83.69(12)  | N3–Ga1–N8 | 97.1(3)   | N7–Cd1–N4 | 86.63(6)   |
| N4–Zn1–N8 | 90.90(7)   | O2–Sn1–O1   | 55.21(8)   | N4–Ga1–N8 | 85.6(3)   | N8–Cd1–N4 | 86.23(7)   |
| N7–Zn1–S1 | 111.35(6)  | N3–Sn1–O1   | 151.17(7)  | N7–Ga1–S1 | 100.1(2)  | N3–Cd1–S1 | 74.74(5)   |
| N3–Zn1–S1 | 79.53(6)   | C22–Sn1–N4  | 82.06(11)  | N3–Ga1–S1 | 82.6(2)   | N7–Cd1–S1 | 126.85(5)  |

|           |           |            |           |           |           |           |           |
|-----------|-----------|------------|-----------|-----------|-----------|-----------|-----------|
| N4-Zn1-S1 | 153.47(5) | C16-Sn1-N4 | 89.04(11) | N4-Ga1-S1 | 159.7(3)  | N8-Cd1-S1 | 91.77(5)  |
| N8-Zn1-S1 | 88.16(6)  | O2-Sn1-N4  | 137.58(9) | N8-Ga1-S1 | 91.0(2)   | N4-Cd1-S1 | 142.71(5) |
| N7-Zn1-S2 | 79.71(5)  | N3-Sn1-N4  | 68.53(11) | N7-Ga1-S2 | 81.9(2)   | N3-Cd1-S2 | 121.22(5) |
| N3-Zn1-S2 | 113.81(6) | O1-Sn1-N4  | 82.70(11) | N3-Ga1-S2 | 102.0(2)  | N7-Cd1-S2 | 74.43(5)  |
| N4-Zn1-S2 | 89.54(6)  | C22-Sn1-S1 | 97.14(13) | N4-Ga1-S2 | 90.5(3)   | N8-Cd1-S2 | 142.10(5) |
| N8-Zn1-S2 | 153.59(5) | C16-Sn1-S1 | 95.11(12) | N8-Ga1-S2 | 159.2(2)  | N4-Cd1-S2 | 96.49(5)  |
| S1-Zn1-S2 | 102.82(3) | O2-Sn1-S1  | 79.78(6)  | S1-Ga1-S2 | 99.41(12) | S1-Cd1-S2 | 107.28(3) |
|           |           | N3-Sn1-S1  | 73.90(8)  |           |           |           |           |
|           |           | O1-Sn1-S1  | 134.87(8) |           |           |           |           |
|           |           | N4-Sn1-S1  | 142.42(6) |           |           |           |           |

**Table S3** The cytotoxicity of the tested compounds against HepG2 cells and QSG7701 cells.  $n = 4$ . Mean  $\pm$  SD.

|                      |                | Tested compounds  |                 |                  |                  |
|----------------------|----------------|-------------------|-----------------|------------------|------------------|
| Hepatocellular cells | Bp44mT         | 1                 | 2               | 3                | 4                |
| HepG2                | 1.45 $\pm$ 0.1 | 6.68 $\pm$ 1.0    | 3.61 $\pm$ 0.15 | 1.7 $\pm$ 0.25   | 2.47 $\pm$ 0.18  |
| QSG7701              | 7.3 $\pm$ 0.18 | 77.64 $\pm$ 10.05 | 9.42 $\pm$ 0.31 | 0.67 $\pm$ 0.069 | 17.05 $\pm$ 1.67 |

**Table S4** Effects of **1** on intracellular ROS in HepG2 cells.  $n = 4$ . Mean  $\pm$  SD.

|                               |                   | Concentrations ( $\mu$ M) |                    |                   |  |
|-------------------------------|-------------------|---------------------------|--------------------|-------------------|--|
| intracellular ROS             | 0                 | 1                         | 5                  | 10                |  |
|                               | 2307              | 3245                      | 5015               | 6670              |  |
| Measured data                 | 2614              | 2628                      | 4891               | 6715              |  |
|                               | 2689              | 3482                      | 5113               | 6779              |  |
|                               | 2623              | 3190                      | 5518               | 5656              |  |
| Mean value                    | 2558.25           | 3136.25                   | 5134.25            | 6455              |  |
| Relative value (% of control) | 100.0 $\pm$ 0.058 | 122.60 $\pm$ 0.12         | 200.70 $\pm$ 0.091 | 252.32 $\pm$ 0.18 |  |

**Table S5** Effect of **1** on MMP in HepG2 cells, the cells were loaded with membrane-sensitive probe Rh123.  $n = 4$ . Mean  $\pm$  SD.

|                               |                   | Concentrations ( $\mu$ M) |                  |                   |  |
|-------------------------------|-------------------|---------------------------|------------------|-------------------|--|
| Rh123                         | 0                 | 1                         | 5                | 10                |  |
|                               | 27022             | 11559                     | 14274            | 7491              |  |
| Measured data                 | 24109             | 12280                     | 15062            | 7702              |  |
|                               | 25379             | 17927                     | 8320             | 6129              |  |
|                               | 28022             | 13454                     | 8645             | 9348              |  |
| Mean value                    | 26133             | 13805                     | 11575.25         | 7667.5            |  |
| Relative value (% of control) | 100.0 $\pm$ 0.057 | 52.83 $\pm$ 0.095         | 44.29 $\pm$ 0.12 | 29.34 $\pm$ 0.044 |  |

**Table S6** Effects of **1**-induced activations of caspase-3. *n* = 4. Mean  $\pm$  SD.

|                   |                 | Concentrations ( $\mu$ M) |                  |                 |      |
|-------------------|-----------------|---------------------------|------------------|-----------------|------|
|                   |                 | 0                         | 1                | 5               | 10   |
| caspase-3         |                 | 2330                      | 2998             | 3668            | 6280 |
| Measured data     |                 | 2416                      | 3088             | 3910            | 9693 |
|                   |                 | 2097                      | 3211             | 3856            | 8345 |
|                   |                 | 2100                      | 2875             | 3722            | 7628 |
| Mean value        | 2235.75         | 3043                      | 3789             | 7986.5          |      |
| Relative activity | 1.0 $\pm$ 0.063 | 1.36 $\pm$ 0.055          | 1.70 $\pm$ 0.044 | 3.57 $\pm$ 0.55 |      |

**Table S7** Effects of **1** on the activation of the p21 gene in HepG2 cells by using in vitro kinase test. *n* = 4. Mean  $\pm$  SD.

|                   |                 | Concentrations ( $\mu$ M) |                 |                 |      |
|-------------------|-----------------|---------------------------|-----------------|-----------------|------|
|                   |                 | 0                         | 1               | 5               | 10   |
| p21 gene          |                 | 3106                      | 3322            | 3217            | 5899 |
| Measured data     |                 | 2761                      | 3854            | 4581            | 6590 |
|                   |                 | 3116                      | 3789            | 4356            | 6675 |
|                   |                 | 2767                      | 3387            | 3442            | 5814 |
| Mean value        | 2937.5          | 3588                      | 3899            | 6244.5          |      |
| Relative activity | 1.0 $\pm$ 0.059 | 1.21 $\pm$ 0.080          | 1.33 $\pm$ 0.19 | 2.13 $\pm$ 0.13 |      |

**Table S8** Effects of **1** on the activation of the p53 gene in HepG2 cells by using in vitro kinase test. *n* = 4. Mean  $\pm$  SD.

|                   |                | Concentrations ( $\mu$ M) |                 |                 |      |
|-------------------|----------------|---------------------------|-----------------|-----------------|------|
|                   |                | 0                         | 1               | 5               | 10   |
| p53 gene          |                | 3451                      | 3561            | 4321            | 6891 |
| Measured data     |                | 2897                      | 2672            | 2156            | 4781 |
|                   |                | 3621                      | 3156            | 3476            | 6671 |
|                   |                | 2455                      | 3899            | 2915            | 5253 |
| Mean value        | 3106           | 3322                      | 3217            | 5899            |      |
| Relative activity | 1.0 $\pm$ 0.15 | 1.07 $\pm$ 0.15           | 1.04 $\pm$ 0.25 | 1.90 $\pm$ 0.29 |      |

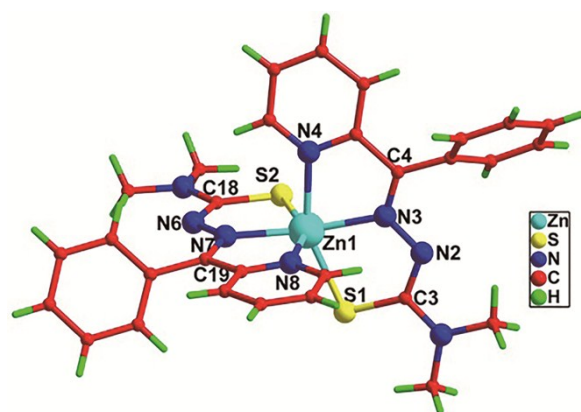

**Figure S1.** Structure of complex 1 with atomic numbering scheme.

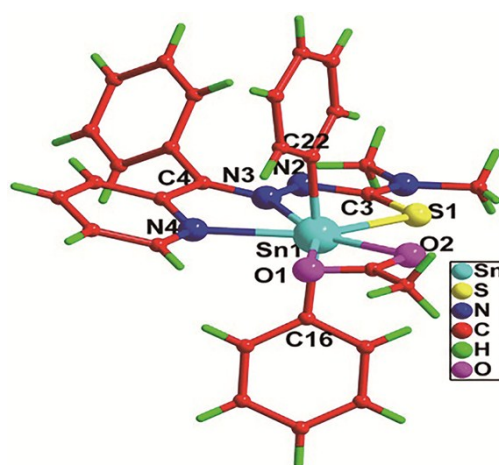

**Figure S2.** Structure of complex 2 with atomic numbering scheme.

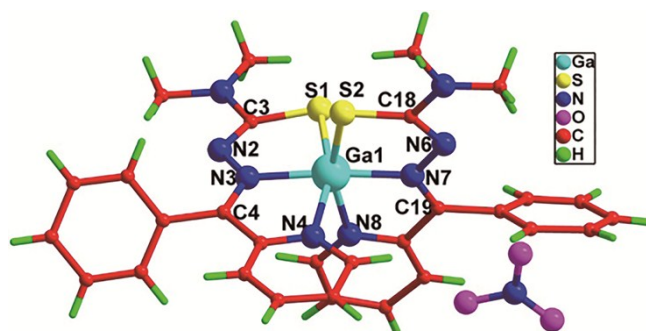

**Figure S3.** Structure of complex 3 with atomic numbering scheme.

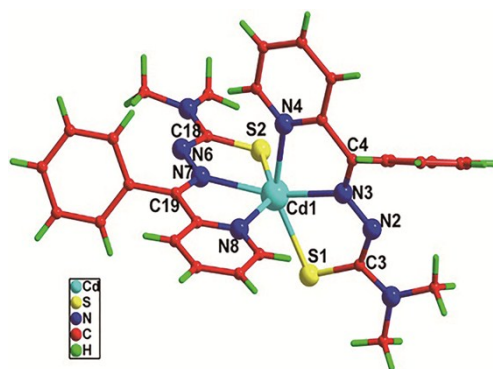

**Figure S4.** Structure of complex 4 with atomic numbering scheme.
